# Supplementary material for: Slow Magnetic Relaxation in Cobalt(II) Complexes with One-Dimensional Hydrogen-Bonded Networks
Source: MDPI journal article supplement (doi:10.3390/magnetochemistry9010017), 2023-01-01
Supplement: s1 [file s1]

## Supporting Information

### Slow magnetic relaxation in cobalt(II) complexes with one-dimensional hydrogen-bonded networks

Ryoji Mitsuhashi,<sup>1,\*</sup> Hiroshi Sakiyama,<sup>2</sup> Yoshihito Hayashi<sup>3</sup>

<sup>1</sup> Institute of Liberal Arts and Science, Kanazawa University; Kakuma, Kanazawa, Ishikawa 920-1192, Japan

<sup>2</sup> Department of Science, Faculty of Science, Yamagata University; 1-4-12 Kojirakawa, Yamagata 990-8560, Japan

<sup>3</sup> Department of Chemistry, Kanazawa University; Kakuma, Kanazawa, Ishikawa 920-1192, Japan

E-mail mitsuhashi@staff.kanazawa-u.ac.jp

#### Contents:

#### 1. X-Ray crystallography

**Figure S1.** Molecular structure of H<sub>2</sub>mthp (50% probability levels). Magenta and cyan dashed lines are hydrogen bonds.

**Table S1.** Hydrogen-bond distances and angles.

#### 2. Ac susceptibility measurements

**Figure S2.** Temperature dependence of (a) the in-phase  $\chi_M'$  vs. frequency plots and (b) out-of-phase  $\chi_M''$  vs. frequency plots for **1**·C<sub>2</sub>H<sub>5</sub>OH in the absence of a dc field with ac frequency of 1–1488 Hz. The lines are guide for the eye.

**Figure S3.** Dc field dependence of (a) the in-phase  $\chi_M'$  vs. frequency plots and (b) out-of-phase  $\chi_M''$  vs. frequency plots for **1**·C<sub>2</sub>H<sub>5</sub>OH at 1.9 K with ac frequency of 1–1488 Hz. The lines are guide for the eye.

**Figure S4.** Temperature dependence of (a) the in-phase  $\chi_M'$  vs. frequency plots and (b) out-of-phase  $\chi_M''$  vs. frequency plots for **1**·C<sub>2</sub>H<sub>5</sub>OH in the presence of 3.5 kOe with ac frequency of 1–1488 Hz. The lines are guide for the eye.

**Figure S5.** Cole–Cole plot for **1**·C<sub>2</sub>H<sub>5</sub>OH (a) in the absence and (b) in the presence of 3.5 kOe dc field. The solid lines represent the fit to a generalized Debye model.

**Table S2.** Cole-Cole fit values for **1**·C<sub>2</sub>H<sub>5</sub>OH in 3.5 kOe dc field from 1.9 to 8.0 K.

**Table S3.** Cole-Cole fit values for **1**·C<sub>2</sub>H<sub>5</sub>OH in 0 kOe dc field from 1.9 to 6.0 K.

**Figure S6.** Dc field dependence of (a) the in-phase  $\chi_M'$  vs. frequency plots and (b) out-of-phase  $\chi_M''$  vs. frequency plots for **2**·1.5C<sub>2</sub>H<sub>5</sub>OH at 1.9 K with ac frequency of 1–1488 Hz. The lines are guide for the eye.

**Figure S7.** Temperature dependence of (a) the in-phase  $\chi_M'$  vs. frequency plots and (b) out-of-phase  $\chi_M''$  vs. frequency plots for **2**·1.5C<sub>2</sub>H<sub>5</sub>OH in the presence of 1.0 kOe with ac frequency of 1–1488 Hz. The lines are guide for the eye.

**Figure S8.** Cole–Cole plot for **2**·1.5C<sub>2</sub>H<sub>5</sub>OH in the presence of 1.0 kOe dc field. The solid lines represent the fit to a generalized Debye model.

**Table S4.** Cole-Cole fit values for **2BF<sub>4</sub>**·1.5C<sub>2</sub>H<sub>5</sub>OH in 1.0 kOe dc field from 1.9 to 6.0 K.

#### 3. <sup>1</sup>H NMR measurement

**Figure S9.** <sup>1</sup>H NMR spectrum of H<sub>2</sub>mthp in CD<sub>3</sub>OD.

#### 4. Infrared spectra

**Figure S10.** Infrared spectra of (a) pristine **1**·C<sub>2</sub>H<sub>5</sub>OH, (b) hydrated **1**·C<sub>2</sub>H<sub>5</sub>OH, (c) pristine **2BF<sub>4</sub>**·1.5C<sub>2</sub>H<sub>5</sub>OH, (d) hydrated **2BF<sub>4</sub>**·1.5C<sub>2</sub>H<sub>5</sub>OH, and H<sub>2</sub>mthp (nujol mull).

## 1. X-Ray crystallography

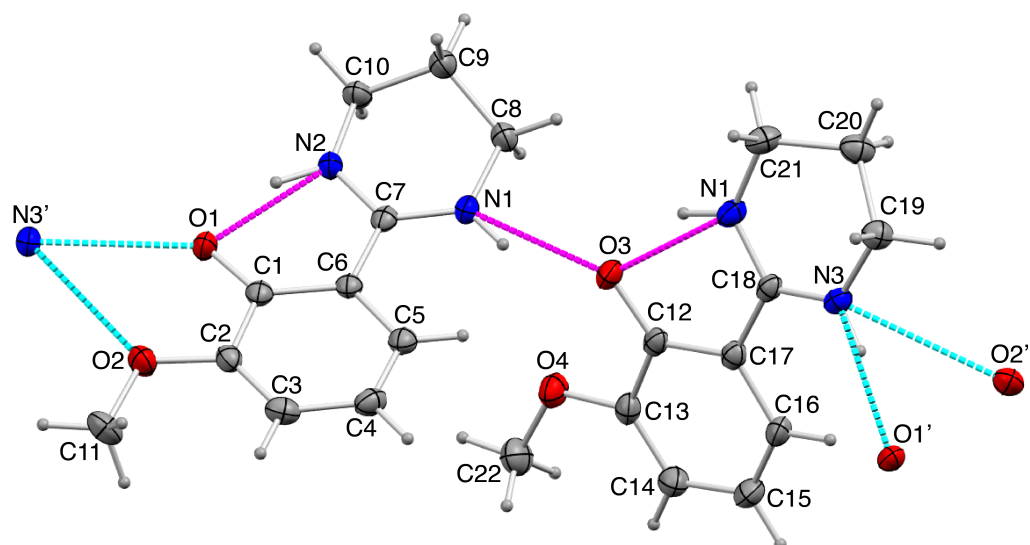

**Figure S1.** Molecular structure of H<sub>2</sub>mthp (50% probability levels). Magenta and cyan dashed lines are hydrogen bonds.

**Table S1.** Hydrogen-bond distances and angles.

|                                                       |    | D–H···A |                   | D–H / Å   | H···A / Å | D···A / Å | D–H···A / ° |
|-------------------------------------------------------|----|---------|-------------------|-----------|-----------|-----------|-------------|
| H <sub>2</sub> mthp                                   | N1 | H1      | O3                | 0.861(18) | 1.93(2)   | 2.729(2)  | 154(2)      |
|                                                       | N2 | H2      | O1                | 0.912(19) | 1.68(2)   | 2.527(2)  | 152(2)      |
|                                                       | N3 | H3A     | O1 <sup>i</sup>   | 0.869(19) | 1.96(2)   | 2.791(2)  | 160(2)      |
|                                                       | N4 | H4A     | O3                | 0.887(19) | 1.78(2)   | 2.565(2)  | 146(2)      |
| 1·C <sub>2</sub> H <sub>5</sub> OH                    | N1 | H1      | O3 <sup>ii</sup>  | 0.78(4)   | 2.10(4)   | 2.826(4)  | 154(4)      |
|                                                       | N1 | H1      | O4 <sup>ii</sup>  | 0.78(4)   | 2.47(4)   | 3.065(4)  | 134(4)      |
|                                                       | N3 | H3A     | O1 <sup>iii</sup> | 0.80(4)   | 2.14(4)   | 2.869(4)  | 152(4)      |
| 2BF <sub>4</sub> ·1.5C <sub>2</sub> H <sub>5</sub> OH | N4 | H4N     | O3                | 0.865(19) | 1.84(3)   | 2.560(5)  | 140(4)      |
|                                                       | N6 | H6N     | O5                | 0.87(2)   | 1.74(3)   | 2.577(5)  | 162(6)      |
|                                                       | N5 | H5N     | O1 <sup>iv</sup>  | 0.85(2)   | 2.00(4)   | 2.781(5)  | 153(8)      |

Symmetry code: (i) = '−x+1/2, −y+1, z+1/2', (ii) = '−x+1, −y+1, −z+2', (iii) = '−x+1, −y+1, −z+1', (iv) = '−x+2, −y+1, −z+1'.

## 2. Ac susceptibility measurements

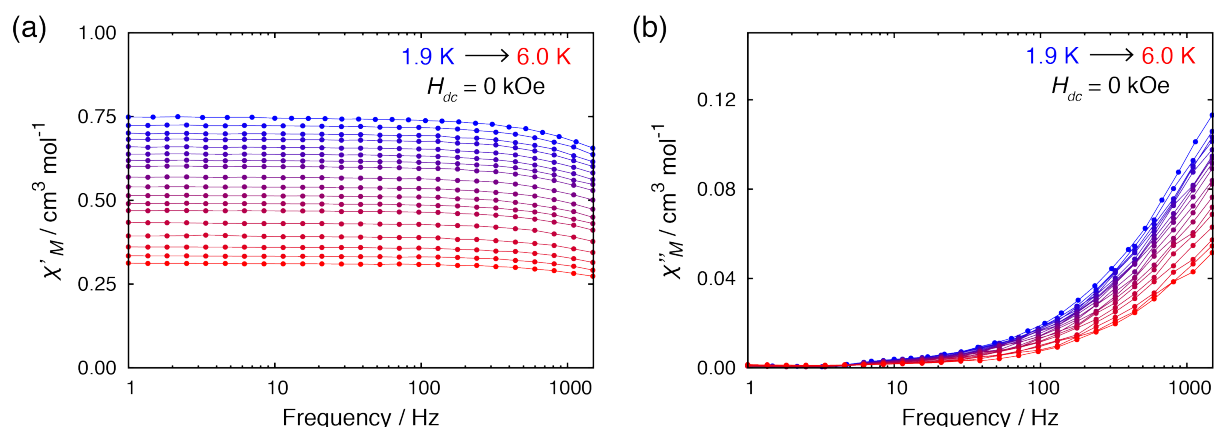

**Figure S2.** Temperature dependence of (a) the in-phase  $\chi'_M$  vs. frequency plots and (b) out-of-phase  $\chi''_M$  vs. frequency plots for  $1\cdot\text{C}_2\text{H}_5\text{OH}$  in the absence of a dc field with ac frequency of 1–1488 Hz. The lines are guide for the eye.

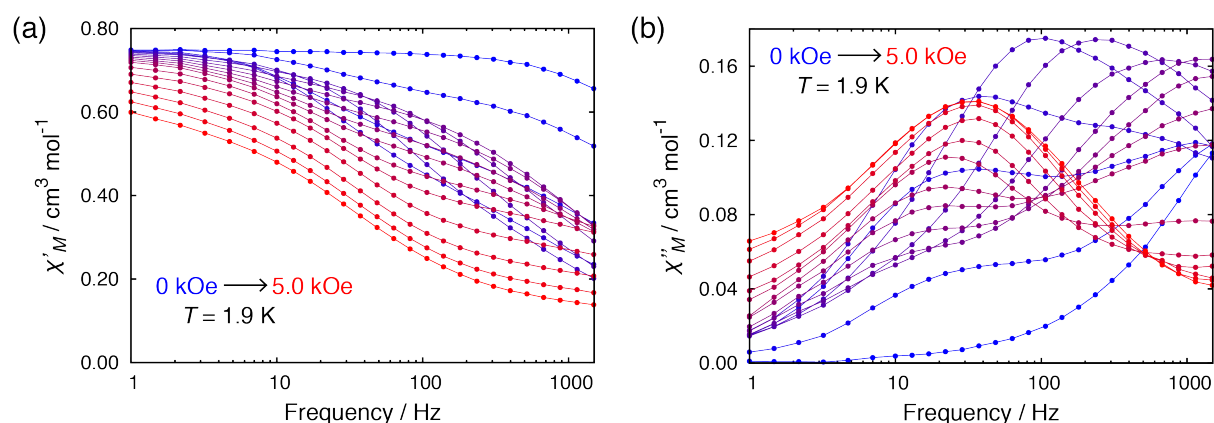

**Figure S3.** Dc field dependence of (a) the in-phase  $\chi'_M$  vs. frequency plots and (b) out-of-phase  $\chi''_M$  vs. frequency plots for  $1\cdot\text{C}_2\text{H}_5\text{OH}$  at 1.9 K with ac frequency of 1–1488 Hz. The lines are guide for the eye.

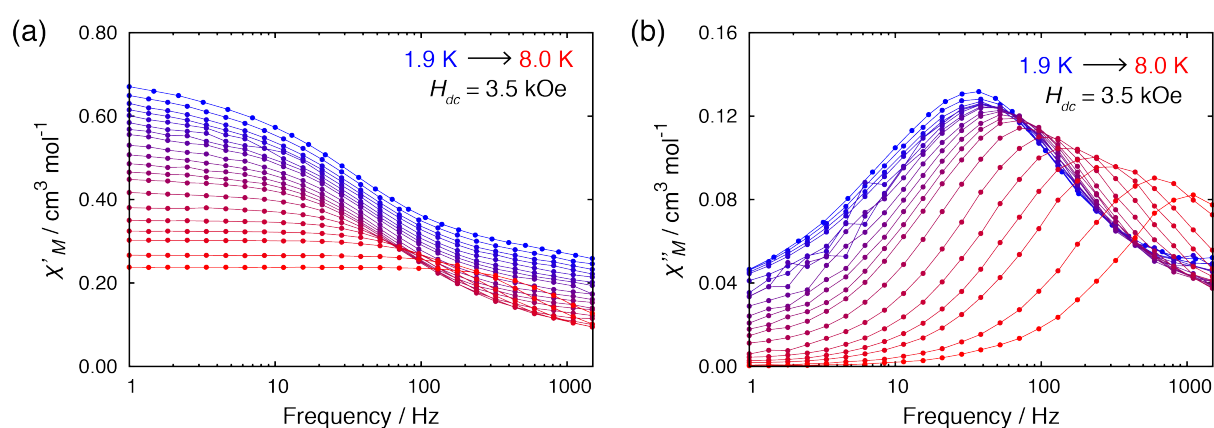

**Figure S4.** Temperature dependence of (a) the in-phase  $\chi'_M$  vs. frequency plots and (b) out-of-phase  $\chi''_M$  vs. frequency plots for  $1\cdot\text{C}_2\text{H}_5\text{OH}$  in the presence of 3.5 kOe with ac frequency of 1–1488 Hz. The lines are guide for the eye.

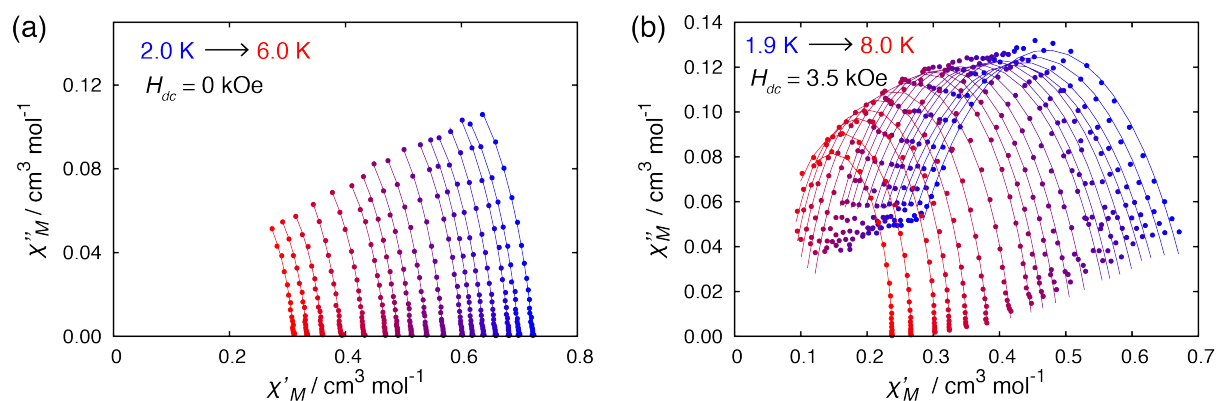

**Figure S5.** Cole–Cole plot for **1**·C<sub>2</sub>H<sub>5</sub>OH (a) in the absence and (b) in the presence of 3.5 kOe dc field. The solid lines represent the fit to a generalized Debye model.

**Table S2.** Cole–Cole fit values for **1**·C<sub>2</sub>H<sub>5</sub>OH in 3.5 kOe dc field from 1.9 to 8.0 K.

| $T / \text{K}$ | $\chi_S / \text{cm}^3 \text{mol}^{-1}$ | $\chi_T / \text{cm}^3 \text{mol}^{-1}$ | $\tau / \text{s}$     | $\alpha$ |
|----------------|----------------------------------------|----------------------------------------|-----------------------|----------|
| 1.9            | 0.2440                                 | 0.6970                                 | $5.13 \times 10^{-3}$ | 0.347    |
| 2.0            | 0.2266                                 | 0.6760                                 | $4.93 \times 10^{-3}$ | 0.356    |
| 2.1            | 0.2117                                 | 0.6549                                 | $4.73 \times 10^{-3}$ | 0.358    |
| 2.2            | 0.2009                                 | 0.6398                                 | $4.51 \times 10^{-3}$ | 0.358    |
| 2.3            | 0.1946                                 | 0.6197                                 | $4.29 \times 10^{-3}$ | 0.333    |
| 2.4            | 0.1852                                 | 0.5994                                 | $4.04 \times 10^{-3}$ | 0.320    |
| 2.5            | 0.1768                                 | 0.5825                                 | $3.85 \times 10^{-3}$ | 0.313    |
| 2.6            | 0.1671                                 | 0.5702                                 | $3.70 \times 10^{-3}$ | 0.313    |
| 2.8            | 0.1573                                 | 0.5395                                 | $3.38 \times 10^{-3}$ | 0.284    |
| 3.0            | 0.1485                                 | 0.5139                                 | $3.10 \times 10^{-3}$ | 0.260    |
| 3.2            | 0.1399                                 | 0.4915                                 | $2.84 \times 10^{-3}$ | 0.242    |
| 3.4            | 0.1327                                 | 0.4705                                 | $2.58 \times 10^{-3}$ | 0.223    |
| 3.6            | 0.1267                                 | 0.4515                                 | $2.36 \times 10^{-3}$ | 0.204    |
| 4.0            | 0.1096                                 | 0.4193                                 | $1.86 \times 10^{-3}$ | 0.196    |
| 4.5            | 0.0980                                 | 0.3837                                 | $1.38 \times 10^{-3}$ | 0.168    |
| 5.0            | 0.0870                                 | 0.3524                                 | $9.89 \times 10^{-4}$ | 0.145    |
| 5.5            | 0.0776                                 | 0.3264                                 | $7.02 \times 10^{-4}$ | 0.130    |
| 6.0            | 0.0699                                 | 0.3041                                 | $4.99 \times 10^{-4}$ | 0.118    |
| 7.0            | 0.0592                                 | 0.2672                                 | $2.62 \times 10^{-4}$ | 0.088    |
| 8.0            | 0.0594                                 | 0.2382                                 | $1.49 \times 10^{-4}$ | 0.058    |

**Table S3.** Cole–Cole fit values for **1**·C<sub>2</sub>H<sub>5</sub>OH in 0 kOe dc field from 1.9 to 6.0 K.

| $T / \text{K}$ | $\chi_S / \text{cm}^3 \text{mol}^{-1}$ | $\chi_T / \text{cm}^3 \text{mol}^{-1}$ | $\tau / \text{s}$     | $\alpha$ |
|----------------|----------------------------------------|----------------------------------------|-----------------------|----------|
| 2.0            | 0.3615                                 | 0.7237                                 | $4.15 \times 10^{-5}$ | 0.200    |
| 2.1            | 0.3536                                 | 0.6995                                 | $4.22 \times 10^{-5}$ | 0.202    |
| 2.2            | 0.3216                                 | 0.6825                                 | $3.88 \times 10^{-5}$ | 0.203    |
| 2.3            | 0.3035                                 | 0.6592                                 | $3.72 \times 10^{-5}$ | 0.207    |
| 2.4            | 0.3079                                 | 0.6385                                 | $3.99 \times 10^{-5}$ | 0.206    |
| 2.5            | 0.2746                                 | 0.6195                                 | $3.57 \times 10^{-5}$ | 0.213    |

|     |        |        |                       |       |
|-----|--------|--------|-----------------------|-------|
| 2.6 | 0.2711 | 0.6019 | $3.68 \times 10^{-5}$ | 0.212 |
| 2.8 | 0.2448 | 0.5693 | $3.58 \times 10^{-5}$ | 0.205 |
| 3.0 | 0.2363 | 0.5403 | $3.65 \times 10^{-5}$ | 0.210 |
| 3.2 | 0.2276 | 0.5141 | $3.80 \times 10^{-5}$ | 0.204 |
| 3.4 | 0.2164 | 0.4907 | $3.67 \times 10^{-5}$ | 0.208 |
| 3.6 | 0.2108 | 0.4694 | $3.71 \times 10^{-5}$ | 0.216 |
| 4.0 | 0.1892 | 0.4322 | $3.78 \times 10^{-5}$ | 0.206 |
| 4.5 | 0.1179 | 0.3935 | $2.56 \times 10^{-5}$ | 0.246 |
| 5.0 | 0.1560 | 0.3604 | $3.69 \times 10^{-5}$ | 0.208 |
| 5.5 | 0.1448 | 0.3337 | $3.82 \times 10^{-5}$ | 0.192 |
| 6.0 | 0.1192 | 0.3114 | $3.36 \times 10^{-5}$ | 0.203 |

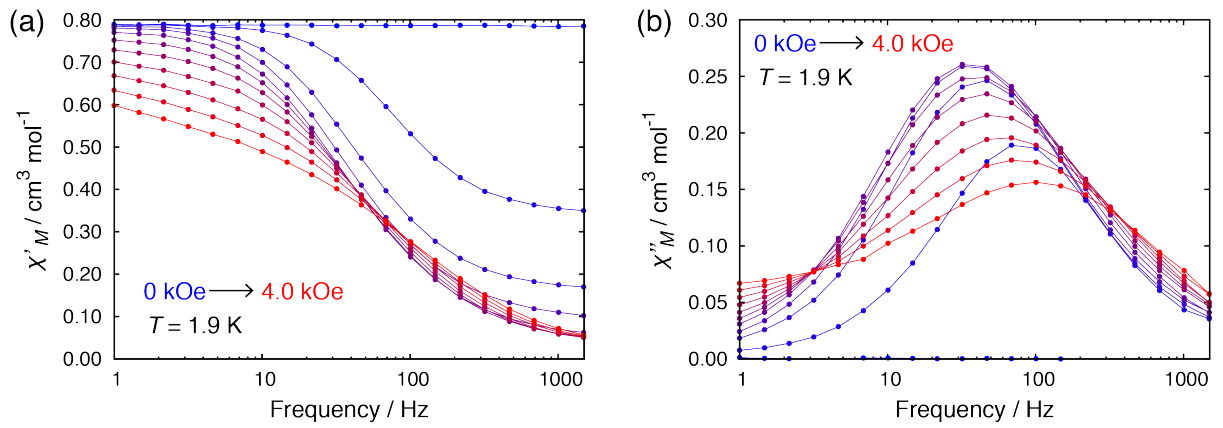

**Figure S6.** Dc field dependence of (a) the in-phase  $\chi_M'$  vs. frequency plots and (b) out-of-phase  $\chi_M''$  vs. frequency plots for  $2 \cdot 1.5\text{C}_2\text{H}_5\text{OH}$  at 1.9 K with ac frequency of 1–1488 Hz. The lines are guide for the eye.

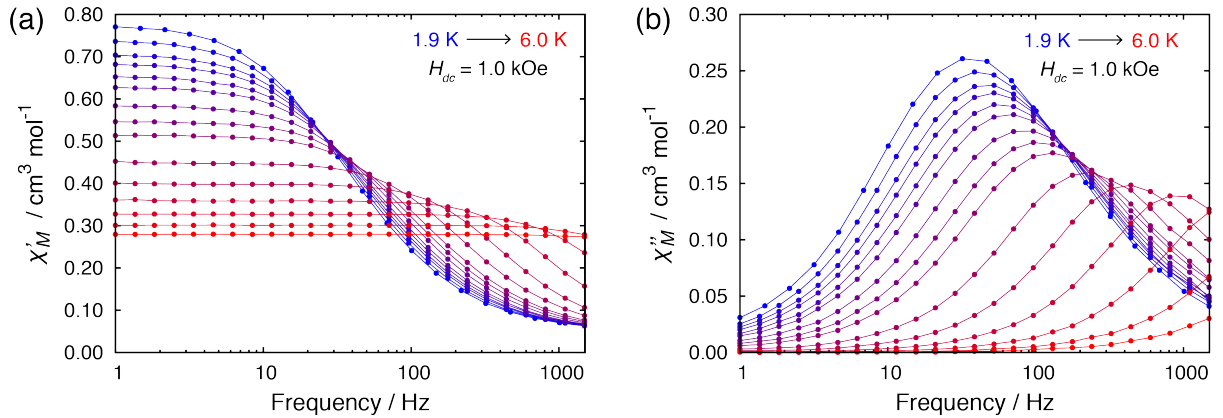

**Figure S7.** Temperature dependence of (a) the in-phase  $\chi_M'$  vs. frequency plots and (b) out-of-phase  $\chi_M''$  vs. frequency plots for  $2 \cdot 1.5\text{C}_2\text{H}_5\text{OH}$  in the presence of 1.0 kOe with ac frequency of 1–1488 Hz. The lines are guide for the eye.

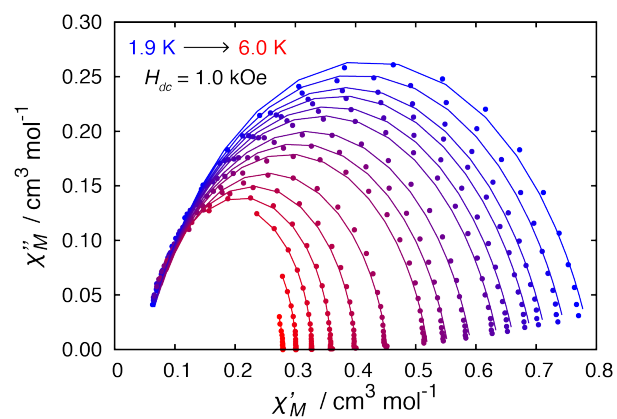

**Figure S8.** Cole–Cole plot for  $2 \cdot 1.5\text{C}_2\text{H}_5\text{OH}$  in the presence of 1.0 kOe dc field. The solid lines represent the fit to a generalized Debye model.

**Table S4.** Cole–Cole fit values for  $2\text{BF}_4 \cdot 1.5\text{C}_2\text{H}_5\text{OH}$  in 1.0 kOe dc field from 1.9 to 6.0 K.

| $T / \text{K}$ | $\chi_s / \text{cm}^3 \text{mol}^{-1}$ | $\chi_T / \text{cm}^3 \text{mol}^{-1}$ | $\tau / \text{s}$     | $\alpha$ |
|----------------|----------------------------------------|----------------------------------------|-----------------------|----------|
| 1.9            | 0.0505                                 | 0.7924                                 | $4.00 \times 10^{-3}$ | 0.212    |
| 2.0            | 0.0500                                 | 0.7553                                 | $3.49 \times 10^{-3}$ | 0.211    |
| 2.1            | 0.0494                                 | 0.7209                                 | $3.06 \times 10^{-3}$ | 0.210    |
| 2.2            | 0.0504                                 | 0.6969                                 | $2.79 \times 10^{-3}$ | 0.206    |
| 2.3            | 0.0508                                 | 0.6661                                 | $2.44 \times 10^{-3}$ | 0.203    |
| 2.4            | 0.0509                                 | 0.6394                                 | $2.16 \times 10^{-3}$ | 0.199    |
| 2.6            | 0.0519                                 | 0.5934                                 | $1.72 \times 10^{-3}$ | 0.190    |
| 2.8            | 0.0522                                 | 0.5544                                 | $1.37 \times 10^{-3}$ | 0.180    |
| 3.0            | 0.0542                                 | 0.5207                                 | $1.11 \times 10^{-3}$ | 0.166    |
| 3.5            | 0.0577                                 | 0.4526                                 | $6.47 \times 10^{-4}$ | 0.128    |
| 4.0            | 0.0597                                 | 0.4005                                 | $3.56 \times 10^{-4}$ | 0.082    |
| 4.5            | 0.0618                                 | 0.3597                                 | $1.74 \times 10^{-4}$ | 0.043    |
| 5.0            | 0.0503                                 | 0.3273                                 | $7.43 \times 10^{-5}$ | 0.025    |
| 5.5            | 0.0410                                 | 0.3011                                 | $2.97 \times 10^{-5}$ | 0.030    |
| 6.0            | 0.0527                                 | 0.2795                                 | $1.35 \times 10^{-5}$ | 0.046    |

### 3. $^1\text{H}$ NMR spectrum

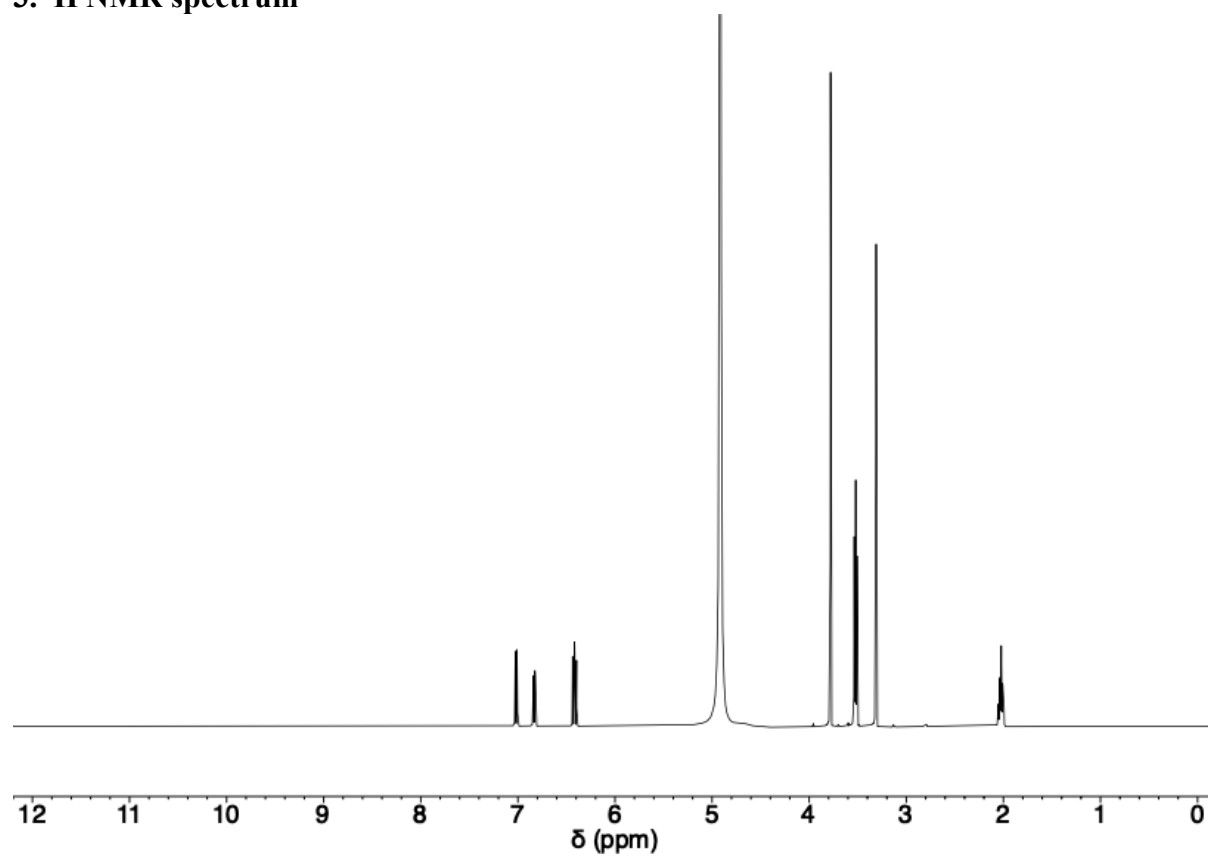

Figure S9.  $^1\text{H}$  NMR spectrum of  $\text{H}_2\text{mthp}$  in  $\text{CD}_3\text{OD}$ .

#### 4. Infrared spectra

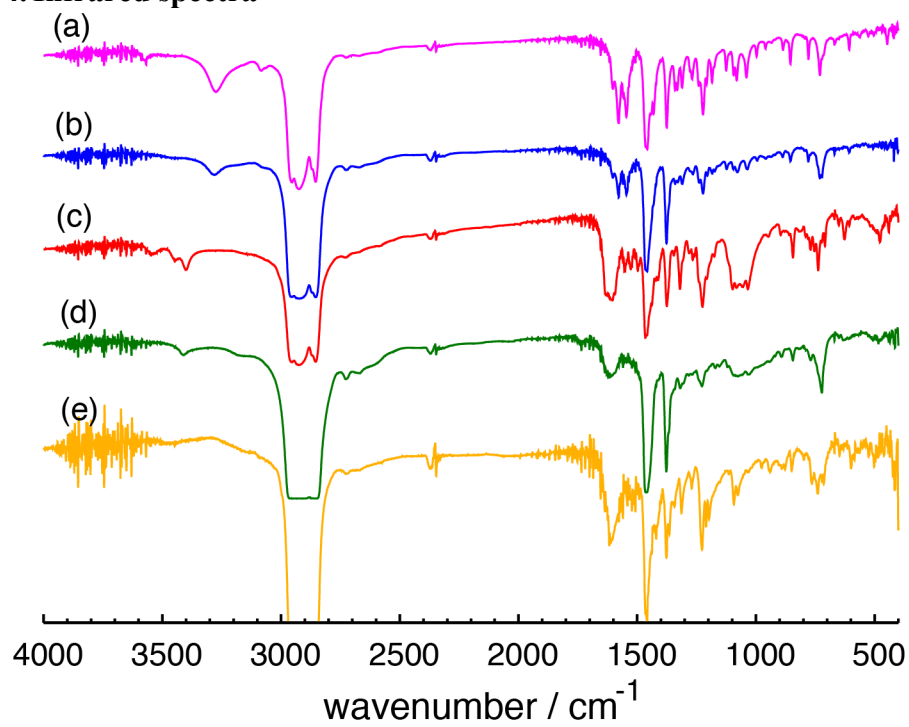

**Figure S10.** Infrared spectra of (a) pristine **1**·C<sub>2</sub>H<sub>5</sub>OH, (b) hydrated **1**·C<sub>2</sub>H<sub>5</sub>OH, (c) pristine **2**BF<sub>4</sub>·1.5C<sub>2</sub>H<sub>5</sub>OH, (d) hydrated **2**BF<sub>4</sub>·1.5C<sub>2</sub>H<sub>5</sub>OH, and H<sub>2</sub>mthp (nujol mull).
